# Supplementary material for: Lessepsian migration and parasitism: richness, prevalence and intensity of parasites in the invasive fish Sphyraena chrysotaenia compared to its native congener Sphyraena sphyraena in Tunisian coastal waters
Source: PeerJ. 2018 Sep 14;6:e5558. doi: 10.7717/peerj.5558 (PMC6140674; doi:10.7717/peerj.5558)
Supplement: Data S1 [file peerj-06-5558-s002.xlsx]

## Sheet: Data Wiem
Host_sp	Location	No_sampled	Inf_P	Inf_L	Inf_C	Inf_PI	Inf_G	Inf_DS	Inf_CM	Inf_BU	Inf_T	Inf_A	Total_P	Total_L	Total_C	Total_PI	Total_G	Total_DS	Total_CM	Total_BU	Total_T	Total_A	Total_inf	Total_no	Richness	TL	SL	FL	TW	EW	Sex
Invasive	1	1	1	0	0	0	0	0	0	0	0	0	1	0	0	0	0	0	0	0	0	0	1	1	1	21.5	18	20.2	56.42	55.85	female
Invasive	1	1	0	1	0	0	0	0	0	0	0	0	0	1	0	0	0	0	0	0	0	0	1	1	1	21	17.6	19.7	57.39	56.86	male
Invasive	1	1	0	0	0	0	0	0	0	0	0	0	0	0	0	0	0	0	0	0	0	0	0	0	0	20.7	17.2	19.4	48.18	47.89	female
Invasive	1	1	0	1	0	0	0	0	0	0	0	0	0	2	0	0	0	0	0	0	0	0	1	2	1	22.5	19.2	21.2	57.36	56.75	female
Invasive	1	1	0	0	0	0	0	0	0	0	0	0	0	0	0	0	0	0	0	0	0	0	0	0	0	24	21	22.7	60.38	95.68	male
Invasive	1	1	0	0	0	0	0	0	0	0	0	0	0	0	0	0	0	0	0	0	0	0	0	0	0	22	18.5	20.4	61.06	60.34	male
Invasive	1	1	0	1	0	0	0	0	0	0	0	0	0	1	0	0	0	0	0	0	0	0	1	1	1	22	18.3	20.5	50.42	49.65	male
Invasive	1	1	0	0	0	0	0	0	0	0	0	0	0	0	0	0	0	0	0	0	0	0	0	0	0	22.2	19	21	52.62	52.14	female
Invasive	1	1	0	0	0	0	0	0	0	0	0	0	0	0	0	0	0	0	0	0	0	0	0	0	0	25.3	21.5	24.1	84.92	83.78	female
Invasive	1	1	1	0	0	0	0	0	0	0	0	0	1	0	0	0	0	0	0	0	0	0	1	1	1	18.8	22.2	17.4	42.28	41.87	female
Invasive	1	1	0	0	0	0	0	0	0	0	0	0	0	0	0	0	0	0	0	0	0	0	0	0	0	21.9	18.7	20.3	61.77	60.95	male
Invasive	1	1	0	0	0	0	0	0	0	0	0	0	0	0	0	0	0	0	0	0	0	0	0	0	0	20.5	17.5	19.2	43.35	42.88	male
Invasive	1	1	0	0	0	0	1	0	0	0	0	0	0	0	0	0	2	0	0	0	0	0	1	2	1	21.8	18.2	20.2	54.3	53.87	male
Invasive	1	1	0	0	0	0	0	0	0	0	0	0	0	0	0	0	0	0	0	0	0	0	0	0	0	21	18	19.5	45.96	45.23	female
Invasive	1	1	0	0	0	0	0	0	0	0	0	0	0	0	0	0	0	0	0	0	0	0	0	0	0	20.4	17.2	19.1	48.78	48.22	female
Invasive	1	1	0	1	0	0	0	0	0	0	0	0	0	2	0	0	0	0	0	0	0	0	1	2	1	22.5	19	21.2	56.54	56.07	male
Invasive	1	1	0	0	0	0	0	0	0	0	0	0	0	0	0	0	0	0	0	0	0	0	0	0	0	21.7	18.2	16.8	53.49	53.08	male
Invasive	2	1	0	1	0	0	0	0	0	0	0	0	0	1	0	0	0	0	0	0	0	0	1	1	1	22.7	19	21.4	56.9	56.22	female
Invasive	2	1	0	0	0	0	0	0	0	0	0	0	0	0	0	0	0	0	0	0	0	0	0	0	0	21.4	18	20	56.6	56.23	male
Invasive	2	1	0	0	0	0	0	0	0	0	0	0	0	0	0	0	0	0	0	0	0	0	0	0	0	23.2	9.5	21.8	63.3	62.5	female
Invasive	2	1	1	0	1	0	0	0	0	0	0	0	1	0	1	0	0	0	0	0	0	0	1	2	2	22.8	19	21.5	64.02	63.26	female
Invasive	2	1	0	1	1	0	0	0	0	0	0	0	0	1	1	0	0	0	0	0	0	0	1	2	2	21.5	18.4	20.2	53.51	52.76	female
Invasive	2	1	0	1	0	0	0	0	0	0	0	0	0	1	0	0	0	0	0	0	0	0	1	1	1	22	18.6	20.6	67.8	67.14	female
Invasive	2	1	0	0	0	0	0	0	0	0	0	0	0	0	0	0	0	0	0	0	0	0	0	0	0	23.4	19.5	22.1	61.7	61.23	male
Invasive	2	1	0	0	0	0	0	0	0	0	0	0	0	0	0	0	0	0	0	0	0	0	0	0	0	21	18	19.4	54.9	54.24	male
Invasive	2	1	0	0	0	0	0	0	0	0	0	0	0	0	0	0	0	0	0	0	0	0	0	0	0	25.2	21.5	23.8	75.8	74.64	male
Invasive	2	1	0	0	0	0	0	0	0	0	0	0	0	0	0	0	0	0	0	0	0	0	0	0	0	21.7	18.5	20.2	55.7	55.11	female
Invasive	2	1	0	0	0	0	0	0	0	0	0	0	0	0	0	0	0	0	0	0	0	0	0	0	0	22.9	19.5	21.3	65.7	64.45	female
Invasive	2	1	0	0	0	0	0	0	0	0	0	0	0	0	0	0	0	0	0	0	0	0	0	0	0	24.9	21.2	23.4	64.12	63.56	female
Invasive	2	1	1	0	0	0	0	0	0	0	0	0	1	0	0	0	0	0	0	0	0	0	1	1	1	20	17	18.7	43.7	43.31	male
Invasive	2	1	0	0	0	0	0	0	0	0	0	0	0	0	0	0	0	0	0	0	0	0	0	0	0	23	19.4	21.6	60.3	59.44	female
Invasive	2	1	1	0	0	0	0	0	0	0	0	0	1	0	0	0	0	0	0	0	0	0	1	1	1	23	17	21.7	45.25	44.87	male
Invasive	2	1	0	0	0	0	0	0	0	0	0	0	0	0	0	0	0	0	0	0	0	0	0	0	0	24.9	21.5	23.3	66.72	65.88	female
Invasive	2	1	0	0	0	0	0	0	0	0	0	0	0	0	0	0	0	0	0	0	0	0	0	0	0	21.8	18.6	20.5	46.3	45.64	female
Invasive	2	1	0	0	0	0	0	0	0	0	0	0	0	0	0	0	0	0	0	0	0	0	0	0	0	24.3	22	23	64.83	63.75	male
Invasive	2	1	0	0	0	0	0	0	0	0	0	0	0	0	0	0	0	0	0	0	0	0	0	0	0	22	18.6	20.6	56.44	55.87	male
Invasive	2	1	0	0	0	0	0	0	0	0	0	0	0	0	0	0	0	0	0	0	0	0	0	0	0	20.8	17.5	19.4	58.01	57.67	male
Invasive	2	1	0	0	0	0	0	0	0	0	0	0	0	0	0	0	0	0	0	0	0	0	0	0	0	22.1	18.6	20.5	58.54	58.11	female
Invasive	2	1	0	0	0	0	0	0	0	0	0	0	0	0	0	0	0	0	0	0	0	0	0	0	0	22.2	19	21	58.55	58.12	male
Invasive	2	1	0	0	0	0	0	0	0	0	0	0	0	0	0	0	0	0	0	0	0	0	0	0	0	20.5	17	19.2	36.04	35.89	female
Invasive	2	1	0	0	0	0	0	0	0	0	0	0	0	0	0	0	0	0	0	0	0	0	0	0	0	18.5	21.5	17	51.8	51.47	female
Invasive	2	1	0	0	0	0	0	0	0	0	0	0	0	0	0	0	0	0	0	0	0	0	0	0	0	22.2	19	20.2	51.7	51.25	male
Invasive	2	1	0	0	0	0	0	0	0	0	0	0	0	0	0	0	0	0	0	0	0	0	0	0	0	17.5	20.5	16.1	52.43	51.97	male
Invasive	2	1	0	0	0	0	0	0	0	0	0	0	0	0	0	0	0	0	0	0	0	0	0	0	0	22.5	19.2	21	63.95	63.17	female
Invasive	2	1	0	1	0	0	0	0	0	0	0	0	0	1	0	0	0	0	0	0	0	0	1	1	1	21.1	17.5	19.5	50.93	50.09	female
Invasive	2	1	0	0	0	0	0	0	0	0	0	0	0	0	0	0	0	0	0	0	0	0	0	0	0	21.9	18.5	20.3	59.2	58.31	female
Invasive	2	1	0	0	0	0	0	0	0	0	0	0	0	0	0	0	0	0	0	0	0	0	0	0	0	22	19	20.2	62.48	61.23	male
Invasive	2	1	0	0	0	0	0	0	0	0	0	0	0	0	0	0	0	0	0	0	0	0	0	0	0	21.5	18.4	19.7	54.85	54.12	male
Invasive	2	1	1	0	0	0	0	0	0	0	0	0	1	0	0	0	0	0	0	0	0	0	1	1	1	26.2	22.5		94.63	93.56	male
Invasive	2	1	0	0	0	0	0	0	0	0	0	0	0	0	0	0	0	0	0	0	0	0	0	0	0	21.4	18	19.4	48.08	47.66	female
Invasive	3	1	0	0	0	0	0	0	0	0	0	0	0	0	0	0	0	0	0	0	0	0	0	0	0	23.7	20	22	70.19	69.29	female
Invasive	3	1	0	1	0	0	0	0	0	0	0	0	0	1	0	0	0	0	0	0	0	0	1	1	1	21.6	18	19.8	5.08	56.29	female
Invasive	3	1	0	0	0	0	0	0	0	0	0	0	0	0	0	0	0	0	0	0	0	0	0	0	0	24.7	20.5	22.6	20.4	79.37	female
Invasive	3	1	0	0	0	0	0	0	0	0	0	0	0	0	0	0	0	0	0	0	0	0	0	0	0	20	17.2	18.6	47.31	46.68	female
Invasive	3	1	0	0	0	0	0	0	0	0	0	0	0	0	0	0	0	0	0	0	0	0	0	0	0	22	1.5	20	55.22	54.36	female
Invasive	3	1	0	0	0	0	0	0	0	0	0	0	0	0	0	0	0	0	0	0	0	0	0	0	0	22.6	19	21	67.79	67.42	male
Invasive	3	1	0	1	0	0	0	0	0	0	0	0	0	1	0	0	0	0	0	0	0	0	1	1	1	22.3	19	21	51.25	56.77	male
Invasive	3	1	0	0	0	0	0	0	0	0	0	0	0	0	0	0	0	0	0	0	0	0	0	0	0	22.4	19.5	21.2	61.29	60.8	male
Invasive	3	1	0	1	0	0	0	0	0	0	0	0	0	1	0	0	0	0	0	0	0	0	1	1	1	21	17.5	19.4	44.02	43.7	male
Invasive	3	1	0	0	0	0	0	0	0	0	0	0	0	0	0	0	0	0	0	0	0	0	0	0	0	20	17	19	44.22	4378	male
Invasive	3	1	0	0	0	0	0	0	0	0	0	0	0	0	0	0	0	0	0	0	0	0	0	0	0	22.5	19	21	60.63	59.87	male
Invasive	3	1	0	0	0	0	0	0	0	0	0	0	0	0	0	0	0	0	0	0	0	0	0	0	0	21.8	18.5	20.5	56.68	56.16	male
Invasive	3	1	0	0	0	0	0	0	0	0	0	0	0	0	0	0	0	0	0	0	0	0	0	0	0	19.8	17	18	52.22	51.99	male
Invasive	3	1	0	0	0	0	0	0	0	0	0	0	0	0	0	0	0	0	0	0	0	0	0	0	0	19.9	16.6	16	49.71	49.31	female
Invasive	3	1	0	0	0	0	0	0	0	0	0	0	0	0	0	0	0	0	0	0	0	0	0	0	0	18.8	16	17	41.89	41.56	female
Invasive	3	1	0	0	0	0	0	0	0	0	0	0	0	0	0	0	0	0	0	0	0	0	0	0	0	19.6	16.5	18	47.6	47.16	male
Invasive	3	1	0	0	0	0	0	0	0	0	0	0	0	0	0	0	0	0	0	0	0	0	0	0	0	19.8	16.5	18	47.87	47.52	male
Invasive	4	1	0	0	1	0	0	0	0	0	0	0	0	0	1	0	0	0	0	0	0	0	1	1	1	23.9	20	22	73.37	72.85	male
Invasive	4	1	0	0	0	0	0	0	0	0	0	0	0	0	0	0	0	0	0	0	0	0	0	0	0	22.5	19	20.2	61.97	61.44	male
Invasive	4	1	0	0	0	1	0	0	0	0	0	0	0	0	0	1	0	0	0	0	0	0	1	1	1	24.8	21	20.2	77.91	76.37	male
Invasive	4	1	0	0	0	0	0	0	0	0	0	0	0	0	0	0	0	0	0	0	0	0	0	0	0	23	19.5	21.1	60.1	59.75	male
Invasive	4	1	0	0	1	0	0	0	0	0	0	0	0	0	1	0	0	0	0	0	0	0	1	1	1	21.4	18	19.7	49.88	49.65	male
Invasive	4	1	0	0	0	0	0	0	0	0	0	0	0	0	0	0	0	0	0	0	0	0	0	0	0	22.7	19	20.8	57.19	55.62	female
Invasive	4	1	0	1	0	0	0	0	0	0	0	0	0	1	0	0	0	0	0	0	0	0	1	1	1	22.3	18.5	20.5	57.55	56.32	female
Invasive	4	1	0	0	0	0	0	0	0	0	0	0	0	0	0	0	0	0	0	0	0	0	0	0	0	22.5	18.7	20.7	64.56	62.75	female
Invasive	4	1	0	0	0	0	0	0	0	0	0	0	0	0	0	0	0	0	0	0	0	0	0	0	0	24.6	20.5	22.7	79.15	78.5	male
Invasive	4	1	0	0	0	0	0	0	0	0	0	0	0	0	0	0	0	0	0	0	0	0	0	0	0	23.1	19.3	21	62.61	62.11	male
Invasive	4	1	0	0	0	0	0	0	0	0	0	0	0	0	0	0	0	0	0	0	0	0	0	0	0	23.5	20	21.8	74.91	74.1	male
Invasive	4	1	0	0	0	0	0	0	0	0	0	0	0	0	0	0	0	0	0	0	0	0	0	0	0	22.2	18	20.5	54.44	53.56	male
Invasive	4	1	0	0	0	0	0	0	0	0	0	0	0	0	0	0	0	0	0	0	0	0	0	0	0	23.2	19	20.6	55.62	54.84	male
Invasive	4	1	0	0	0	0	0	0	0	0	0	0	0	0	0	0	0	0	0	0	0	0	0	0	0	22.2	18.5	20.5	58.76	58.58	male
Invasive	4	1	0	0	0	0	0	0	0	0	0	0	0	0	0	0	0	0	0	0	0	0	0	0	0	19.7	16.5	18.2	39.65	39.4	male
Invasive	4	1	0	0	0	0	0	0	0	0	0	0	0	0	0	0	0	0	0	0	0	0	0	0	0	22	18.5	20.3	56.88	56.31	female
Invasive	4	1	0	0	0	0	0	0	0	0	0	0	0	0	0	0	0	0	0	0	0	0	0	0	0	23.6	19.5	22.2	71.26	69.45	female
Invasive	4	1	0	0	0	0	0	0	0	0	0	0	0	0	0	0	0	0	0	0	0	0	0	0	0	21.6	18	20	51.96	51.44	male
Invasive	4	1	0	0	0	0	0	0	0	0	0	0	0	0	0	0	0	0	0	0	0	0	0	0	0	24.4	20.5	22.5	80.31	68.45	male
Invasive	5	1	0	0	0	0	0	0	0	0	0	0	0	0	0	0	0	0	0	0	0	0	0	0	0	22.3	18.5	20.5	59.37	58.25	female
Invasive	5	1	0	1	0	0	0	0	0	0	0	0	0	5	0	0	0	0	0	0	0	0	1	5	1	20.5	17	19	41.47	40.78	male
Invasive	5	1	0	1	0	0	0	0	0	0	0	0	0	1	0	0	0	0	0	0	0	0	1	1	1	22.2	18.8	20.2	57.8	57.11	female
Invasive	5	1	0	0	0	0	0	0	0	0	0	0	0	0	0	0	0	0	0	0	0	0	0	0	0	23	20	21.5	58.4	57.26	female
Invasive	5	1	0	0	0	0	0	0	0	0	0	0	0	0	0	0	0	0	0	0	0	0	0	0	0	20	17	18.5	46.73	46.46	male
Invasive	5	1	0	0	0	0	0	0	0	0	0	0	0	0	0	0	0	0	0	0	0	0	0	0	0	20	17.2	18.4	44.94	44.5	male
Invasive	5	1	0	0	0	0	0	0	0	0	0	0	0	0	0	0	0	0	0	0	0	0	0	0	0	25.2	21.5	23.2	82.26	81.07	female
Invasive	5	1	0	1	0	0	0	0	0	0	0	0	0	1	0	0	0	0	0	0	0	0	1	1	1	21.8	18	20	63.2	62.94	male
Invasive	5	1	0	0	0	0	0	0	0	0	0	0	0	0	0	0	0	0	0	0	0	0	0	0	0	20.5	17	18.7	45.18	44.86	male
Invasive	5	1	0	0	0	0	0	0	0	0	0	0	0	0	0	0	0	0	0	0	0	0	0	0	0	22.5	19	20.5	55.32	54.2	female
Invasive	5	1	0	0	0	0	0	0	0	0	0	0	0	0	0	0	0	0	0	0	0	0	0	0	0	19.7	16.5	18.3	41.47	40.52	female
Invasive	5	1	0	0	0	0	0	0	0	0	0	0	0	0	0	0	0	0	0	0	0	0	0	0	0	20	17	18.6	46	45.58	male
Invasive	5	1	0	1	0	0	0	0	0	0	0	0	0	2	0	0	0	0	0	0	0	0	1	2	1	22	18.3	20	59.51	58.17	female
Invasive	5	1	0	1	0	0	0	0	0	0	0	0	0	1	0	0	0	0	0	0	0	0	1	1	1	23	19.2	21	65.74	65.18	female
Invasive	5	1	0	0	0	0	0	0	0	0	0	0	0	0	0	0	0	0	0	0	0	0	0	0	0	23.7	197	21.8	72.25	71.77	female
Invasive	5	1	0	0	0	0	0	0	0	0	0	0	0	0	0	0	0	0	0	0	0	0	0	0	0	21.4	18.2	19.8	55.82	55.25	female
Invasive	5	1	0	0	0	0	0	0	0	0	0	0	0	0	0	0	0	0	0	0	0	0	0	0	0	22.6	19	20.8	59.52	58.66	female
Invasive	5	1	0	0	0	0	0	0	0	0	0	0	0	0	0	0	0	0	0	0	0	0	0	0	0	24	20	22.2	73.24	72.44	female
Invasive	5	1	0	0	0	0	0	0	0	0	0	0	0	0	0	0	0	0	0	0	0	0	0	0	0	19.7	16.5	18.1	41.86	41.21	female
Invasive	5	1	0	0	1	0	0	0	0	0	0	0	0	0	1	0	0	0	0	0	0	0	1	1	1	22	18.5	20.2	56.79	56.12	female
Invasive	5	1	0	0	0	0	0	0	0	0	0	0	0	0	0	0	0	0	0	0	0	0	0	0	0	22.5	19.2	20.9	68.06	67.78	female
Invasive	6	1	0	0	0	0	0	0	0	0	0	0	0	0	0	0	0	0	0	0	0	0	0	0	0	21	18	19.2	52.73	52.31	female
Invasive	6	1	0	0	0	0	0	0	0	0	0	0	0	0	0	0	0	0	0	0	0	0	0	0	0	21.9	18.5	20.2	60.88	59.87	male
Invasive	6	1	0	0	0	0	0	0	0	0	0	0	0	0	0	0	0	0	0	0	0	0	0	0	0	21	17.8	19.7	55.06	54.69	female
Invasive	6	1	0	0	0	0	0	0	0	0	0	0	0	0	0	0	0	0	0	0	0	0	0	0	0	21	17.5	19.5	52.76	52.14	male
Invasive	6	1	0	0	0	0	0	0	0	0	0	0	0	0	0	0	0	0	0	0	0	0	0	0	0	23	19.5	21	70.07	96.31	female
Invasive	6	1	0	0	0	0	0	0	0	0	0	0	0	0	0	0	0	0	0	0	0	0	0	0	0	19.3	16.5	17.5	43.25	42.88	female
Invasive	6	1	0	0	0	0	0	0	0	0	0	0	0	0	0	0	0	0	0	0	0	0	0	0	0	21.2	17.5	19.5	52.7	52.13	female
Invasive	6	1	0	0	0	0	0	0	0	0	0	0	0	0	0	0	0	0	0	0	0	0	0	0	0	20.5	17.5	19.2	53.09	52.74	female
Invasive	6	1	0	0	0	0	0	0	0	0	0	0	0	0	0	0	0	0	0	0	0	0	0	0	0	20	17	18.5	46.79	46.18	male
Invasive	6	1	0	0	0	0	0	0	0	0	0	0	0	0	0	0	0	0	0	0	0	0	0	0	0	19.3	16.5	18	42.18	41.69	female
Invasive	6	1	0	0	0	0	0	0	0	0	0	0	0	0	0	0	0	0	0	0	0	0	0	0	0	22.4	19	20.4	61.7	61	female
Invasive	6	1	0	0	0	0	0	0	0	0	0	0	0	0	0	0	0	0	0	0	0	0	0	0	0	21.2	18	19.7	55.8	55.12	male
Invasive	6	1	0	0	0	0	0	0	0	0	0	0	0	0	0	0	0	0	0	0	0	0	0	0	0	21.2	18	19.5	54.8	54.11	mae
Invasive	6	1	0	0	0	0	0	0	0	0	0	0	0	0	0	0	0	0	0	0	0	0	0	0	0	20.2	17	19.7	49.48	49.06	female
Invasive	6	1	0	0	0	0	0	0	0	0	0	0	0	0	0	0	0	0	0	0	0	0	0	0	0	20.5	17.3	19.4	53.32	52.95	male
Invasive	6	1	0	0	0	0	0	0	0	0	0	0	0	0	0	0	0	0	0	0	0	0	0	0	0	21.2	17.8	17.8	53.18	52.72	male
Invasive	6	1	0	0	0	0	0	0	0	0	0	0	0	0	0	0	0	0	0	0	0	0	0	0	0	21.5	20	20	57.05	56.74	female
Invasive	7	1	0	0	0	0	0	0	0	0	0	0	0	0	0	0	0	0	0	0	0	0	0	0	0	20	17	18.5	54.13	53.77	female
Invasive	7	1	0	0	0	0	0	0	0	0	0	0	0	0	0	0	0	0	0	0	0	0	0	0	0	19.7	16.5	15.4	46.01	45.86	female
Invasive	7	1	0	0	0	0	0	0	0	0	0	0	0	0	0	0	0	0	0	0	0	0	0	0	0	19.9	16.5	18.2	51.24	50.94	male
Invasive	7	1	0	0	0	0	0	0	0	0	0	0	0	0	0	0	0	0	0	0	0	0	0	0	0	19	18.2	17.5	44.16	43.87	male
Invasive	7	1	0	0	0	0	0	0	0	0	0	0	0	0	0	0	0	0	0	0	0	0	0	0	0	20.3	17	18.7	58.12	57.78	female
Invasive	7	1	0	0	0	0	0	0	0	0	0	0	0	0	0	0	0	0	0	0	0	0	0	0	0	19.5	16.5	18.2	54.44	54.21	female
Invasive	7	1	0	0	0	0	0	0	0	0	0	0	0	0	0	0	0	0	0	0	0	0	0	0	0	22.8	19.5	21	61.72	61.11	female
Invasive	7	1	0	0	0	0	0	0	0	0	0	0	0	0	0	0	0	0	0	0	0	0	0	0	0	23	19.5	21.2	69.32	68.89	male
Invasive	7	1	0	0	0	0	0	0	0	0	0	0	0	0	0	0	0	0	0	0	0	0	0	0	0	21.6	18.5	20	56.03	55.76	male
Invasive	7	1	0	0	0	0	0	0	0	0	0	0	0	0	0	0	0	0	0	0	0	0	0	0	0	22.8	19.5	21	61.72	61.27	female
Invasive	7	1	0	0	0	0	0	0	0	0	0	0	0	0	0	0	0	0	0	0	0	0	0	0	0	23	19.5	21.2	69.32	68.56	male
Invasive	7	1	0	0	0	0	0	0	0	0	0	0	0	0	0	0	0	0	0	0	0	0	0	0	0	21.6	18.5	20	56.03	55.78	male
Invasive	7	1	0	0	0	0	0	0	0	0	0	0	0	0	0	0	0	0	0	0	0	0	0	0	0	22.5	19	20.8	56.76	56.22	male
Invasive	7	1	0	0	0	0	0	0	0	0	0	0	0	0	0	0	0	0	0	0	0	0	0	0	0	21	17.5	19.3	49.55	49.12	male
Invasive	7	1	0	0	0	0	0	0	0	0	0	0	0	0	0	0	0	0	0	0	0	0	0	0	0	21.6	18.3	20	52.72	52.26	male
Invasive	7	1	0	0	0	0	0	0	0	0	0	0	0	0	0	0	0	0	0	0	0	0	0	0	0	22.4	18.7	20.5	5655	56.25	male
Invasive	7	1	0	0	0	0	0	0	0	0	0	0	0	0	0	0	0	0	0	0	0	0	0	0	0	21.6	18.7	19.7	52.42	52.09	male
Invasive	7	1	0	0	0	0	0	0	0	0	0	0	0	0	0	0	0	0	0	0	0	0	0	0	0	20.8	17.5	19.4	48.2	47.89	male
Invasive	7	1	0	0	0	0	0	0	0	0	0	0	0	0	0	0	0	0	0	0	0	0	0	0	0	21.4	18.4	19.7	50.05	49.65	male
Invasive	7	1	0	0	0	0	0	0	0	0	0	0	0	0	0	0	0	0	0	0	0	0	0	0	0	23.2	19	21.2	65.26	64.89	male
Invasive	7	1	0	0	0	0	0	0	0	0	0	0	0	0	0	0	0	0	0	0	0	0	0	0	0	20.1	16.5	18.5	51.46	51.14	female
Invasive	7	1	0	0	0	0	0	0	0	0	0	0	0	0	0	0	0	0	0	0	0	0	0	0	0	18.6	15.5	17.3	39.67	39.13	male
Invasive	7	1	0	0	0	0	0	0	0	0	0	0	0	0	0	0	0	0	0	0	0	0	0	0	0	20.5	17.5	19	57.53	57.12	male
Invasive	7	1	0	0	0	0	0	0	0	0	0	0	0	0	0	0	0	0	0	0	0	0	0	0	0	18.4	15.5	17.1	43.53	43.17	male
Native	1	1	0	0	0	0	0	1	0	0	0	0	0	0	0	0	0	2	0	0	0	0	1	2	1	33	28.9	30.1	108.7	106.33	female
Native	1	1	0	0	0	0	0	1	0	0	0	0	0	0	0	0	0	1	0	0	0	0	1	1	1	25.8	22.5	22.4	94.9	89.45	male
Native	1	1	0	0	0	0	0	1	0	0	0	0	0	0	0	0	0	4	0	0	0	0	1	4	1	25.7	21.3	23.2	94.6	89.24	male
Native	1	1	0	0	0	0	0	1	0	0	0	0	0	0	0	0	0	1	0	0	0	0	1	1	1	27.3	24.5	24.8	96.7	95.45	female
Native	1	1	0	0	0	0	0	1	0	0	0	0	0	0	0	0	0	2	0	0	0	0	1	2	1	28	25.7	25.7	99	97.45	female
Native	1	1	0	0	0	0	0	0	0	0	0	0	0	0	0	0	0	0	0	0	0	0	0	0	0	28	25.8	23.2	98	97.16	male
Native	2	1	0	0	0	0	0	1	0	0	0	0	0	0	0	0	0	14	0	0	0	0	1	14	1	32.22	27.6	29.5	112.8	110.33	female
Native	2	1	0	0	0	0	0	0	0	1	0	0	0	0	0	0	0	0	0	1	0	0	1	1	1	30.6	26.3	28.2	102.4	100.44	female
Native	2	1	0	0	0	0	0	0	0	1	0	0	0	0	0	0	0	0	0	1	0	0	1	1	1	33.3	28.5	30.6	107.6	104.89	female
Native	2	1	0	0	0	0	0	1	0	1	0	0	0	0	0	0	0	1	0	1	0	0	1	2	2	32.5	28	30.1	106.4	104.23	female
Native	2	1	0	0	0	0	0	1	0	1	0	0	0	0	0	0	0	8	0	2	0	0	1	10	2	34.7	30	31.3	118.8	116.37	female
Native	2	1	0	0	0	0	0	1	0	0	0	0	0	0	0	0	0	1	0	0	0	0	1	1	1	31.7	27.5	28.7	120.4	117.89	female
Native	2	1	0	0	0	0	0	0	0	0	0	1	0	0	0	0	0	0	0	0	0	2	1	2	1	32.5	28	30.1	143.4	141.23	female
Native	2	1	0	0	0	0	0	1	0	0	0	0	0	0	0	0	0	4	0	0	0	0	1	4	1	36	31	33.8	110.8	108.32	male
Native	2	1	0	0	0	0	0	1	0	1	0	0	0	0	0	0	0	9	0	1	0	0	1	10	2	32	28	25.9	108.5	106.58	male
Native	2	1	0	0	0	0	0	1	0	0	0	0	0	0	0	0	0	3	0	0	0	0	1	3	1	33	28.5	26.7	110.5	108.23	female
Native	2	1	0	0	0	0	0	1	0	0	0	0	0	0	0	0	0	2	0	0	0	0	1	2	1	33.5	29.5	26.8	112.8	110.95	female
Native	2	1	0	0	0	0	0	1	0	1	0	0	0	0	0	0	0	3	0	1	0	0	1	4	2	32.7	28.7	30.2	110.5	107.6	female
Native	2	1	0	0	0	0	0	1	0	0	0	0	0	0	0	0	0	2	0	0	0	0	1	2	1	32	28.3	29.8	108.5	105.98	female
Native	2	1	0	0	0	0	0	1	0	0	0	0	0	0	0	0	0	3	0	0	0	0	1	3	1	31.4	27.5	25.3	110.6	108.54	female
Native	2	1	0	0	0	0	0	1	0	1	0	0	0	0	0	0	0	4	0	1	0	0	1	5	2	32.4	29	26.8	112.3	110.34	female
Native	2	1	0	0	0	0	0	1	0	0	0	0	0	0	0	0	0	2	0	0	0	0	1	2	1	41.5	35.5	33.2	185.4	183.21	female
Native	2	1	0	0	0	0	0	1	0	0	0	0	0	0	0	0	0	2	0	0	0	0	1	2	1	42.7	37	40.2	187.3	185.46	female
Native	2	1	0	0	0	0	0	0	0	1	0	0	0	0	0	0	0	0	0	4	0	0	1	4	1	38.5	33.5	3.1	144.2	142.11	male
Native	2	1	0	0	0	0	0	1	0	0	0	0	0	0	0	0	0	2	0	0	0	0	1	2	1	39.2	33.5	36.8	145	142.87	female
Native	2	1	0	0	0	0	0	1	0	0	0	0	0	0	0	0	0	2	0	0	0	0	1	2	1	37.2	32.3	34.7	141.8	13946	female
Native	2	1	0	0	0	0	0	1	0	0	0	0	0	0	0	0	0	4	0	0	0	0	1	4	1	38.3	33.7	31.2	142.3	1138.45	male
Native	2	1	0	0	0	0	0	1	0	0	0	0	0	0	0	0	0	5	0	0	0	0	1	5	1	33.5	29.2	30.8	112.6	108.37	male
Native	2	1	0	0	0	0	0	0	0	0	0	0	0	0	0	0	0	0	0	0	0	0	0	0	0	36.3	31.2	33.4	120.2	117.34	female
Native	2	1	0	0	0	0	0	1	0	0	0	0	0	0	0	0	0	2	0	0	0	0	1	2	1	38.5	33	35.3	142.2	138.76	female
Native	2	1	0	0	0	0	0	1	0	0	0	0	0	0	0	0	0	2	0	0	0	0	1	2	1	37.2	32.3	34.2	141.2	138.21	female
Native	2	1	0	0	0	0	0	1	1	1	1	0	0	0	0	0	0	23	1	1	13	0	1	38	4	30.1	26	27.5	107.2	104.89	male
Native	2	1	0	0	0	0	0	0	0	0	1	0	0	0	0	0	0	0	0	0	30	0	1	30	1	33.2	28.5	30.5	110.4	108.2	male
Native	2	1	0	0	0	0	0	1	0	0	0	0	0	0	0	0	0	4	0	0	0	0	1	4	1	30	25.8	27.5	106.2	102.31	female
Native	2	1	0	0	0	0	0	1	1	0	0	0	0	0	0	0	0	2	1	0	0	0	1	3	2	38.8	33.5	35.5	142.3	139.45	male
Native	2	1	0	0	0	0	0	0	0	1	1	0	0	0	0	0	0	0	0	3	20	0	1	23	2	31	26.5	27.7	107.3	105.31	male
Native	2	1	0	0	0	0	0	1	0	0	0	0	0	0	0	0	0	4	0	0	0	0	1	4	1	33.4	28.7	28.7	147.14	144.12	female
Native	3	1	0	0	0	0	0	0	0	1	0	1	0	0	0	0	0	0	0	1	0	4	1	5	2	36.5	34.1	35.4	137.45	134.22	female
Native	3	1	0	0	0	0	0	1	0	1	0	0	0	0	0	0	0	15	0	1	0	0	1	16	2	31.8	27.5	29.2	131.96	128.75	male
Native	3	1	0	0	0	0	0	1	0	1	0	0	0	0	0	0	0	5	0	1	0	0	1	6	2	29.2	25	27	113.58	111.45	male
Native	3	1	0	0	0	0	0	1	0	0	0	0	0	0	0	0	0	6	0	0	0	0	1	6	1	30.7	26.5	28.2	114.57	111.78	female
Native	3	1	0	0	0	0	0	1	0	0	1	0	0	0	0	0	0	8	0	0	1	0	1	9	2	27.5	23.5	25	99.56	96.34	female
Native	3	1	0	0	0	0	0	1	0	0	0	0	0	0	0	0	0	8	0	0	0	0	1	8	1	29	25	26.2	106.87	103.33	male
Native	3	1	0	0	0	0	0	1	0	0	0	0	0	0	0	0	0	2	0	0	0	0	1	2	1	26.7	22.4	23.9	87.56	84.21	male
Native	3	1	0	0	0	0	0	0	0	0	0	0	0	0	0	0	0	0	0	0	0	0	0	0	0	28.5	24.4	26.2	112.37	109.47	female
Native	3	1	0	0	0	0	0	1	0	0	0	0	0	0	0	0	0	1	0	0	0	0	1	1	1	29.5	25.5	27.2	132.56	128.42	female
Native	3	1	0	0	0	0	0	1	0	1	0	0	0	0	0	0	0	4	0	3	0	0	1	7	2	35.5	31.4	33.2	146.56	143.21	male
Native	3	1	0	0	0	0	0	1	0	0	0	0	0	0	0	0	0	12	0	0	0	0	1	12	1	37.6	33.7	35.3	158.78	154.7	male
Native	3	1	0	0	0	0	0	1	0	0	0	0	0	0	0	0	0	2	0	0	0	0	1	2	1	27.8	23.5	25.1	121.45	118.34	female
Native	3	1	0	0	0	0	0	1	0	0	0	0	0	0	0	0	0	3	0	0	0	0	1	3	1	29.4	25.5	27	136.49	133.75	female
Native	3	1	0	0	0	0	0	1	0	0	0	0	0	0	0	0	0	8	0	0	0	0	1	8	1	31.6	27.8	29.3	118.78	114.89	female
Native	3	1	0	0	0	0	0	1	0	1	0	0	0	0	0	0	0	6	0	0	0	0	1	6	2	32.3	28.4	30.1	126.41	123.45	female
Native	3	1	0	0	0	0	0	1	0	1	0	0	0	0	0	0	0	12	0	3	0	0	1	15	2	33	29.2	30.8	133.55	130.21	female
Native	3	1	0	0	0	0	0	1	0	0	0	0	0	0	0	0	0	5	0	0	0	0	1	5	1	28	24.2	25.8	77.64	74.35	male
Native	3	1	0	0	0	0	0	1	0	0	0	0	0	0	0	0	0	12	0	0	0	0	1	12	1	31.2	27.3	28.9	111.46	108.35	male
Native	4	1	0	0	0	0	0	1	0	0	0	0	0	0	0	0	0	6	0	0	0	0	1	6	1	31.5	27.5	24.6	117.2	114.98	female
Native	4	1	0	0	0	0	0	1	0	0	0	0	0	0	0	0	0	1	0	0	0	0	1	1	1	30.5	26.4	27.8	103.7	101.23	female
Native	4	1	0	0	0	0	0	1	0	0	0	0	0	0	0	0	0	19	0	0	0	0	1	19	1	31.4	27.3	29.2	101.4	99.36	female
Native	4	1	0	0	0	0	0	1	0	0	0	0	0	0	0	0	0	3	0	0	0	0	1	3	1	32	28.5	29.8	118.2	15.9	female
Native	4	1	0	0	0	0	0	1	0	0	0	0	0	0	0	0	0	7	0	0	0	0	1	7	1	28.3	25.5	26.1	101.5	98.8	female
Native	4	1	0	0	0	0	0	0	0	0	0	0	0	0	0	0	0	0	0	0	0	0	0	0	0	29.7	25.8	26.7	102.6	99.64	male
Native	4	1	0	0	0	0	0	0	0	0	0	0	0	0	0	0	0	0	0	0	0	0	0	0	0	30.3	26.6	27	103.5	101.23	female
Native	4	1	0	0	0	0	0	1	0	0	0	0	0	0	0	0	0	2	0	0	0	0	1	2	1	34.4	29.5	31.4	120.5	117.8	female
Native	4	1	0	0	0	0	0	1	0	0	0	0	0	0	0	0	0	13	0	0	0	0	1	13	1	28.6	26.3	26.2	100.6	98.56	female
Native	5	1	0	0	0	0	0	1	1	1	0	0	0	0	0	0	0	1	2	2	0	0	1	5	3	39	34	36	223.37	220.15	male
Native	5	1	0	0	0	0	0	1	0	1	0	0	0	0	0	0	0	5	0	1	0	0	1	6	2	38	33	35	192.31	188.87	female
Native	5	1	0	0	0	0	0	1	0	1	0	0	0	0	0	0	0	2	0	2	0	0	1	4	2	38	32.5	35	198.58	196.93	female
Native	5	1	0	0	0	0	0	0	1	0	0	0	0	0	0	0	0	0	4	0	0	0	1	4	1	37.5	32.5	34.3	201.68	197.75	female
Native	5	1	0	0	0	0	0	1	1	1	0	0	0	0	0	0	0	3	1	8	0	0	1	12	3	42.5	36.6	39	270.05	266.62	female
Native	5	1	0	0	0	0	0	1	0	0	0	0	0	0	0	0	0	4	0	0	0	0	1	4	1	41.7	36	38.5	255.43	251.41	female
Native	5	1	0	0	0	0	0	1	0	0	0	0	0	0	0	0	0	4	0	0	0	0	1	4	1	42.3	36.5	38.4	28695	283.48	female
Native	6	1	0	0	0	0	0	1	0	1	0	0	0	0	0	0	0	10	0	3	0	0	1	13	2	30.5	26	28.2	123.54	120.19	male
Native	6	1	0	0	0	0	0	1	0	1	0	0	0	0	0	0	0	6	0	1	0	0	1	7	2	28.5	24.2	26.3	82.34	78.45	male
Native	6	1	0	0	0	0	0	1	0	0	0	0	0	0	0	0	0	6	0	0	0	0	1	6	1	29.3	25.4	27.2	104.37	101.45	female
Native	6	1	0	0	0	0	0	1	0	0	0	0	0	0	0	0	0	2	0	0	0	0	1	2	1	33	28.6	31.3	121.74	117.88	female
Native	6	1	0	0	0	0	0	1	0	0	0	0	0	0	0	0	0	1	0	0	0	0	1	1	1	31	27.2	28.7	115.64	111.2	male
Native	6	1	0	0	0	0	0	1	0	1	0	0	0	0	0	0	0	4	0	3	0	0	1	7	2	32.4	28.2	29.3	121.56	118.23	male
Native	6	1	0	0	0	0	0	1	0	0	0	0	0	0	0	0	0	12	0	0	0	0	1	12	1	28.5	24.3	25.9	75.54	74.17	female
Native	6	1	0	0	0	0	0	1	0	0	0	0	0	0	0	0	0	2	0	0	0	0	1	2	1	26.4	21.6	23.1	112.39	109.75	female
Native	6	1	0	0	0	0	0	1	0	1	0	0	0	0	0	0	0	6	0	1	0	0	1	7	2	40.2	36.4	37.8	256.32	251.2	male
Native	6	1	0	0	0	0	0	1	0	1	0	0	0	0	0	0	0	15	0	1	0	0	1	16	2	28.6	24.3	25.9	79.64	76.31	female
Native	6	1	0	0	0	0	0	1	0	1	0	0	0	0	0	0	0	5	0	1	0	0	1	6	2	27.7	23.3	24.7	85.56	82.78	female
Native	6	1	0	0	0	0	0	1	0	0	0	0	0	0	0	0	0	6	0	0	0	0	1	6	1	28.4	24.4	25.9	75.65	74.14	male
Native	6	1	0	0	0	0	0	1	0	1	0	0	0	0	0	0	0	12	0	3	0	0	1	15	2	29.5	25.3	27.2	86.97	83.77	female
Native	6	1	0	0	0	0	0	1	0	0	0	0	0	0	0	0	0	6	0	0	0	0	1	6	1	33.2	29.4	31	122.54	119.87	female
Native	6	1	0	0	0	0	0	1	0	0	0	0	0	0	0	0	0	2	0	0	0	0	1	2	1	35.5	31.4	33.1	129.34	126.78	female
Native	6	1	0	0	0	0	0	1	0	0	0	0	0	0	0	0	0	6	0	0	0	0	1	6	1	38.3	34.5	36	147.65	144.31	female
Native	6	1	0	0	0	0	0	1	0	0	0	0	0	0	0	0	0	6	0	0	0	0	1	6	1	37.5	33.2	34.8	143.35	138.45	female
Native	7	1	0	0	0	0	0	1	0	0	0	0	0	0	0	0	0	2	0	0	0	0	1	2	1	35.7	30.5	33	172.51	170.08	male
Native	7	1	0	0	0	0	0	1	0	0	0	0	0	0	0	0	0	3	0	0	0	0	1	3	1	30	25.5	27.5	108.22	107.82	male
Native	7	1	0	0	0	0	0	1	0	0	0	0	0	0	0	0	0	6	0	0	0	0	1	6	1	30.2	25.5	27.5	92.29	91.52	female
Native	7	1	0	0	0	0	0	1	0	0	0	0	0	0	0	0	0	6	0	0	0	0	1	6	1	30.5	26	28	101.13	99.96	female
Native	7	1	0	0	0	0	0	0	0	0	0	0	0	0	0	0	0	0	0	0	0	0	0	0	0	35.3	30	31.5	152.02	150.66	female
Native	7	1	0	0	0	0	0	1	0	0	0	0	0	0	0	0	0	12	0	0	0	0	1	12	1	37.5	32	35.9	182.82	180.66	female
Native	7	1	0	0	0	0	0	1	1	0	0	0	0	0	0	0	0	3	6	0	0	0	1	9	2	37.4	33	35.1	207.57	203.92	female
Native	7	1	0	0	0	0	0	1	0	1	0	0	0	0	0	0	0	12	0	3	0	0	1	15	2	27.4	23.5	26	78.04	77.62	female
Native	7	1	0	0	0	0	0	1	0	0	0	0	0	0	0	0	0	6	0	0	0	0	1	6	1	31.5	27	28.8	119.62	117.88	female
Native	7	1	0	0	0	0	0	1	0	0	0	0	0	0	0	0	0	2	0	0	0	0	1	2	1	29.8	25	27.3	106.4	105.48	female
Native	7	1	0	0	0	0	0	0	0	0	0	0	0	0	0	0	0	0	0	0	0	0	0	0	0	28	23.7	25.7	89.23	88.8	female
Native	7	1	0	0	0	0	0	1	0	0	0	0	0	0	0	0	0	1	0	0	0	0	1	1	1	33.5	28	30	117.89	117.19	female
Native	7	1	0	0	0	0	0	1	0	1	0	0	0	0	0	0	0	4	0	3	0	0	1	7	2	28.9	24.5	26.5	88.73	88.01	female
Native	7	1	0	0	0	0	0	1	0	0	0	0	0	0	0	0	0	12	0	0	0	0	1	12	1	27.9	24	25.5	72.01	71.78	female
Native	7	1	0	0	0	0	0	1	0	0	0	0	0	0	0	0	0	2	0	0	0	0	1	2	1	27.4	23.5	25	59.97	59.24	female
Native	7	1	0	0	0	0	0	1	0	1	0	0	0	0	0	0	0	6	0	1	0	0	1	7	2	37	32.3	34.3	177.11	175.9	female
Native	7	1	0	0	0	0	0	0	0	0	0	0	0	0	0	0	0	0	0	0	0	0	0	0	0	28	24	26.6	70.85	67.24	male
Native	7	1	0	0	0	0	1	1	0	0	0	0	0	0	0	0	13	12	0	0	0	0	1	25	2	40.6	37.5	37.5	210.3	207.34	female
Native	7	1	0	0	0	0	0	1	0	1	0	0	0	0	0	0	0	8	0	3	0	0	1	11	2	37.6	32.5	35.2	176.4	173.97	male

## Sheet: Feuil3
Abbreviations
P	Pseudempleurosoma sp.
L	Lecithochirium sp.
C	caligus sp.
PI	piscicolidae
G	Gnathia sp.
DS	Didymozoon sohyraenae
CM	chauhanea mediterranea
BU	Bomolochus unicirrus
T	tetraphilidae
A	Anisakidae
inf	infected with
total	number of parsites
total_inf	is 0 when uninfected, or 1 when infected with at least 1 parasite species
total_int	total number of parsasites
TL	total length
SL	standard length
FL	Fork length
TW	total weight
EW	eviscerated weight

## Sheet: Feuil2
	Location	Specimens	Inf_Didymozoon sohyraenae	Inf_chauhanea mediterranea	inf_Bomolochus unicirrus	inf_tetraphilidae	inf_Gnathia sp.	inf_Anisakidae	Total_Didymozoon sohyraenae	Total_chauhanea mediterranea	Total_Bomolochus unicirrus	Total_tetraphilidae	Total_Gnathia sp.	Total_Anisakidae	Richness	Richness
Native	1	1	1	0	0	0	0	0	2	0	0	0	0	0	1	1
Native	1	2	1	0	0	0	0	0	1	0	0	0	0	0	1	1
Native	1	3	1	0	0	0	0	0	4	0	0	0	0	0	1	1
Native	1	4	1	0	0	0	0	0	1	0	0	0	0	0	1	1
Native	1	5	1	0	0	0	0	0	2	0	0	0	0	0	1	1
Native	1	6	0	0	0	0	0	0	0	0	0	0	0	0	0	0
Native	2	7	1	0	0	0	0	0	14	0	0	0	0	0	1	1
Native	2	8	0	0	1	0	0	0	0	0	1	0	0	0	1	1
Native	2	9	0	0	1	0	0	0	0	0	1	0	0	0	1	1
Native	2	10	1	0	1	0	0	0	1	0	1	0	0	0	2	2
Native	2	11	1	0	1	0	0	0	8	0	2	0	0	0	2	2
Native	2	12	1	0	0	0	0	0	1	0	0	0	0	0	1	1
Native	2	13	0	0	0	0	0	1	0	0	0	0	0	2	1	1
Native	2	14	1	0	0	0	0	0	4	0	0	0	0	0	1	1
Native	2	15	1	0	1	0	0	0	9	0	1	0	0	0	2	2
Native	2	16	1	0	0	0	0	0	3	0	0	0	0	0	1	1
Native	2	17	1	0	0	0	0	0	2	0	0	0	0	0	1	1
Native	2	18	1	0	1	0	0	0	3	0	1	0	0	0	2	2
Native	2	19	1	0	0	0	0	0	2	0	0	0	0	0	1	1
Native	2	20	1	0	0	0	0	0	3	0	0	0	0	0	1	1
Native	2	21	1	0	1	0	0	0	4	0	1	0	0	0	2	2
Native	2	22	1	0	0	0	0	0	2	0	0	0	0	0	1	1
Native	2	23	1	0	0	0	0	0	2	0	0	0	0	0	1	1
Native	2	24	0	0	1	0	0	0	0	0	4	0	0	0	1	1
Native	2	25	1	0	0	0	0	0	2	0	0	0	0	0	1	1
Native	2	26	1	0	0	0	0	0	2	0	0	0	0	0	1	1
Native	2	27	1	0	0	0	0	0	4	0	0	0	0	0	1	1
Native	2	28	1	0	0	0	0	0	5	0	0	0	0	0	1	1
Native	2	29	0	0	0	0	0	0	0	0	0	0	0	0	0	0
Native	2	30	1	0	0	0	0	0	2	0	0	0	0	0	1	1
Native	2	31	1	0	0	0	0	0	2	0	0	0	0	0	1	1
Native	2	32	1	1	1	1	0	0	23	1	1	13	0	0	4	4
Native	2	33	0	0	0	1	0	0	0	0	0	30	0	0	1	1
Native	2	34	1	0	0	0	0	0	4	0	0	0	0	0	1	1
Native	2	35	1	1	0	0	0	0	2	1	0	0	0	0	2	2
Native	2	36	0	0	1	1	0	0	0	0	3	20	0	0	2	2
Native	2	37	1	0	0	0	0	0	4	0	0	0	0	0	1	1
Native	3	38	0	0	1	0	0	1	0	0	1	0	0	4	2	2
Native	3	39	1	0	1	0	0	0	15	0	1	0	0	0	2	2
Native	3	40	1	0	1	0	0	0	5	0	1	0	0	0	2	2
Native	3	41	1	0	0	0	0	0	6	0	0	0	0	0	1	1
Native	3	42	1	0	0	1	0	0	8	0	0	1	0	0	2	2
Native	3	43	1	0	0	0	0	0	8	0	0	0	0	0	1	1
Native	3	44	1	0	0	0	0	0	2	0	0	0	0	0	1	1
Native	3	45	0	0	0	0	0	0	0	0	0	0	0	0	0	0
Native	3	46	1	0	0	0	0	0	1	0	0	0	0	0	1	1
Native	3	47	1	0	1	0	0	0	4	0	3	0	0	0	2	2
Native	3	48	1	0	0	0	0	0	12	0	0	0	0	0	1	1
Native	3	49	1	0	0	0	0	0	2	0	0	0	0	0	1	1
Native	3	50	1	0	0	0	0	0	3	0	0	0	0	0	1	1
Native	3	51	1	0	0	0	0	0	8	0	0	0	0	0	1	1
Native	3	52	1	0	1	0	0	0	6	0	0	0	0	0	2	2
Native	3	53	1	0	1	0	0	0	12	0	3	0	0	0	2	2
Native	3	54	1	0	0	0	0	0	5	0	0	0	0	0	1	1
Native	3	55	1	0	0	0	0	0	12	0	0	0	0	0	1	1
Native	4	56	1	0	0	0	0	0	6	0	0	0	0	0	1	1
Native	4	57	1	0	0	0	0	0	1	0	0	0	0	0	1	1
Native	4	58	1	0	0	0	0	0	19	0	0	0	0	0	1	1
Native	4	59	1	0	0	0	0	0	3	0	0	0	0	0	1	1
Native	4	60	1	0	0	0	0	0	7	0	0	0	0	0	1	1
Native	4	61	0	0	0	0	0	0	0	0	0	0	0	0	0	0
Native	4	62	0	0	0	0	0	0	0	0	0	0	0	0	0	0
Native	4	63	1	0	0	0	0	0	2	0	0	0	0	0	1	1
Native	4	64	1	0	0	0	0	0	13	0	0	0	0	0	1	1
Native	5	65	1	1	1	0	0	0	1	2	2	0	0	0	3	3
Native	5	66	1	0	1	0	0	0	5	0	1	0	0	0	2	2
Native	5	67	1	0	1	0	0	0	2	0	2	0	0	0	2	2
Native	5	68	0	1	0	0	0	0	0	4	0	0	0	0	1	1
Native	5	69	1	1	1	0	0	0	3	1	8	0	0	0	3	3
Native	5	70	1	0	0	0	0	0	4	0	0	0	0	0	1	1
Native	5	71	1	0	0	0	0	0	4	0	0	0	0	0	1	1
Native	6	72	1	0	1	0	0	0	10	0	3	0	0	0	2	2
Native	6	73	1	0	1	0	0	0	6	0	1	0	0	0	2	2
Native	6	74	1	0	0	0	0	0	6	0	0	0	0	0	1	1
Native	6	75	1	0	0	0	0	0	2	0	0	0	0	0	1	1
Native	6	76	1	0	0	0	0	0	1	0	0	0	0	0	1	1
Native	6	77	1	0	1	0	0	0	4	0	3	0	0	0	2	2
Native	6	78	1	0	0	0	0	0	12	0	0	0	0	0	1	1
Native	6	79	1	0	0	0	0	0	2	0	0	0	0	0	1	1
Native	6	80	1	0	1	0	0	0	6	0	1	0	0	0	2	2
Native	6	81	1	0	1	0	0	0	15	0	1	0	0	0	2	2
Native	6	82	1	0	1	0	0	0	5	0	1	0	0	0	2	2
Native	6	83	1	0	0	0	0	0	6	0	0	0	0	0	1	1
Native	6	84	1	0	1	0	0	0	12	0	3	0	0	0	2	2
Native	6	85	1	0	0	0	0	0	6	0	0	0	0	0	1	1
Native	6	86	1	0	0	0	0	0	2	0	0	0	0	0	1	1
Native	6	87	1	0	0	0	0	0	6	0	0	0	0	0	1	1
Native	6	88	1	0	0	0	0	0	6	0	0	0	0	0	1	1
Native	7	89	1	0	0	0	0	0	2	0	0	0	0	0	1	1
Native	7	90	1	0	0	0	0	0	3	0	0	0	0	0	1	1
Native	7	91	1	0	0	0	0	0	6	0	0	0	0	0	1	1
Native	7	92	1	0	0	0	0	0	6	0	0	0	0	0	1	1
Native	7	93	0	0	0	0	0	0	0	0	0	0	0	0	0	0
Native	7	94	1	0	0	0	0	0	12	0	0	0	0	0	1	1
Native	7	95	1	1	0	0	0	0	3	6	0	0	0	0	2	2
Native	7	96	1	0	1	0	0	0	12	0	3	0	0	0	2	2
Native	7	97	1	0	0	0	0	0	6	0	0	0	0	0	1	1
Native	7	98	1	0	0	0	0	0	2	0	0	0	0	0	1	1
Native	7	99	0	0	0	0	0	0	0	0	0	0	0	0	0	0
Native	7	100	1	0	0	0	0	0	1	0	0	0	0	0	1	1
Native	7	101	1	0	1	0	0	0	4	0	3	0	0	0	2	2
Native	7	102	1	0	0	0	0	0	12	0	0	0	0	0	1	1
Native	7	103	1	0	0	0	0	0	2	0	0	0	0	0	1	1
Native	7	104	1	0	1	0	0	0	6	0	1	0	0	0	2	2
Native	7	105	0	0	0	0	0	0	0	0	0	0	0	0	0	0
Native	7	106	1	0	0	0	1	0	12	0	0	0	13	0	2	2
Native	7	107	1	0	1	0	0	0	8	0	3	0	0	0	2	2
